# Supplementary material
Source: Royal Society of Chemistry journal article supplement (doi:10.1039/d5ta10466a)
Supplement: d5ta10466a2.pdf [file d5ta10466a2.pdf]

## *Supporting Information*

### **High-Temperature Variant of Oxygen-Rich Covalent Triazine Frameworks as Multifunctional Electrocatalysts**

Ashish Kumar Maharana,<sup>ab</sup> Sourav Kumar Sarkar,<sup>ab</sup> Rahul Sarkar,<sup>ab</sup> Bibek Dash,<sup>ab</sup> Mrutyunjaya Majhi<sup>ab</sup> and Sanjib Das<sup>\*ab</sup>

<sup>a</sup>Materials Chemistry & Interfacial Engineering Department, CSIR-Institute of Minerals & Materials Technology, Bhubaneswar 751013, India.

<sup>b</sup>Academy of Scientific and Innovative Research (AcSIR), Ghaziabad 201002, India.

*\*Corresponding Author: sanjibdas.immt@csir.res.in*

#### **General information:**

All chemical reagents were procured from reputable commercial sources and utilized as received unless specified otherwise.

#### **Experimental measurements:**

The crystallographic features of the samples were examined first by **powder X-ray diffraction** (PXRD) using a Rigaku Ultima-IV diffractometer equipped with monochromated Cu-K $\alpha$  radiation ( $\lambda = 1.54060 \text{ \AA}$ ); measurements were taken at 40 kV and 30 mA with a scan rate of  $2^\circ \text{ min}^{-1}$  and a step size of  $0.01^\circ$  in  $2\theta$ . **Fourier-transform infrared** (FT-IR) spectra were then recorded over the  $400\text{-}4000 \text{ cm}^{-1}$  range using a Thermo Scientific Nicolet iS20 Smart iTX-Diamond ATR instrument. **Raman** analysis was performed with a Renishaw inVia confocal Raman microscope operated with a 532 nm diode laser. Morphological characterization was carried out by **field-emission scanning electron microscopy** (FE-SEM) on a JEOL JSM IT 800 SHL system, while **transmission electron microscopy** (TEM) imaging was conducted using a JEOL-JEM F200 microscope operated at 200 kV; for TEM, powdered samples were dispersed in ethanol and a drop of the suspension was deposited onto a carbon-coated copper grid. High-resolution **X-ray photoelectron spectroscopy** (XPS) was obtained using a Thermo Fisher Scientific ESCALAB Xi<sup>+</sup> spectrometer. **Gas adsorption and desorption** measurements up to 1 bar were performed on a Quantachrome Autosorb-iQ analyzer. Prior to analysis, samples were degassed under dynamic vacuum at  $140 \text{ }^\circ\text{C}$  for 12 hours. Nitrogen adsorption isotherms at 77 K were collected using a liquid-nitrogen bath, and Brunauer–Emmett–Teller (BET) surface areas were calculated from data in the relative pressure range 0.05–0.30 P/P<sub>0</sub>. Total pore volumes were taken near 0.99 P/P<sub>0</sub>, whereas the micropore volume was obtained at 0.10 P/P<sub>0</sub>. Pore size distributions and associated pore volumes were evaluated using the non-local density functional theory (NL-DFT) slit-pore model for carbon materials.

### Oxygen Reduction Reaction:

The ORR activity of the catalysts was evaluated using a three-electrode configuration on a CHI 7091E electrochemical workstation (CH Instruments, USA). A rotating disk electrode (RDE, glassy carbon, 5 mm diameter; ALS, Japan) coated with the catalyst served as the working electrode, while a graphite rod (6 mm diameter) and an Ag/AgCl (3 M KCl) electrode were used as the counter and reference electrodes, respectively. To prepare the catalyst ink, 5 mg of catalyst was ultrasonically dispersed for 45 minutes in a mixture of isopropanol and water (1:1, 490  $\mu\text{L}$ ) along with 10  $\mu\text{L}$  of 5 wt% Nafion to obtain a uniform suspension. Then, 10  $\mu\text{L}$  of this ink was drop-cast onto the glassy carbon electrode and allowed to dry at room temperature, giving a catalyst loading of approximately 0.51 mg  $\text{cm}^{-2}$ . For comparison, commercial Pt/C (20 wt%, Sigma-Aldrich) was prepared and applied following the same procedure. All potentials were converted to the reversible hydrogen electrode (RHE) scale using the Nernst equation.

$$E_{\text{RHE}} = E_{\text{Ag/AgCl}} + 0.198 \text{ V} + 0.0591 \times \text{pH} \quad (1)$$

The electron transfer number per oxygen molecule was determined by using Koutechey-Levich (K-L) equation as follows: <sup>S1</sup>

$$\frac{1}{j} = \frac{1}{J_K} + \frac{1}{J_L} = \frac{1}{J_K} + \frac{1}{B \omega^{1/2}} \quad (2)$$

$$B = 0.62 nFC_0(D_0)^{2/3}\nu^{-1/6} \quad (3)$$

$$J_k = nFKC_0 \quad (4)$$

Where  $j$ ,  $J_k$  and  $J_L$  are measured, kinetic and diffusion current densities,  $\omega$  is the angular velocity ( $\omega = 2\pi N$ ,  $N$  is the linear rotation speed),  $n$  is the number of electron transfer,  $F$  is the faraday constant (96500 C  $\text{mol}^{-1}$ ),  $C_0$  is the bulk concentration of  $\text{O}_2$  ( $1.2 \times 10^{-6}$  mol  $\text{cm}^{-3}$ ),  $D_0$  is the diffusion coefficient of  $\text{O}_2$  ( $1.9 \times 10^{-5}$   $\text{cm}^2 \text{ s}^{-1}$ ),  $\nu$  is the kinetic viscosity of electrolyte ( $0.01$   $\text{cm}^2 \text{ s}^{-1}$ ) and  $K$  is the electron transfer rate constant. Rotating ring-disk electrode (RRDE) measurements were carried out at a scan rate of 5  $\text{mV s}^{-1}$  over the same potential window used for the RDE experiments. The RRDE assembly featured a 5 mm glassy carbon disk paired with a platinum ring as the working electrode. From the RRDE data, the electron transfer number ( $n$ ) and the percentage of  $\text{H}_2\text{O}_2$  produced were determined using the equations shown below.

S2

$$n = \frac{4 \times I_D}{I_D + \frac{I_R}{N}} \quad (5)$$

$$H_2O_2 (\%) = \frac{200 \times \frac{I_R}{N}}{I_D + \frac{I_R}{N}} \quad (6)$$

Here,  $I_D$  represents the disk current,  $I_R$  denotes the ring current, and  $N$  is the ring collection efficiency, supplied by the manufacturer ( $N = 0.37$ ).

### **Zinc-Air battery:**

The aqueous ZAB was assembled using polished zinc foil (100  $\mu\text{m}$  thick, MTI Corporation) as the anode, a gas diffusion layer coated with catalyst as the cathode, a Celgard 5550 membrane as the separator, and 6 M KOH as the electrolyte. For the rechargeable cell, a 6 M KOH solution containing 0.2 M zinc acetate was utilized. The catalyst ink was prepared by dispersing 10 mg of the active material in a mixture of isopropanol and water (0.5 mL, 1:1 v/v), along with 10  $\mu\text{L}$  of 5 wt% Nafion solution to form a uniform suspension. The mixture was sonicated for 30 min to obtain a homogeneous ink. Subsequently, the required amount of catalyst ink was drop-cast onto a 1  $\text{cm}^2$  gas diffusion layer, resulting in a catalyst loading of 3  $\text{mg cm}^{-2}$ . For comparison, commercial Pt/C (20 wt%, Sigma-Aldrich) was also employed as a reference catalyst. All measurements were carried out using a Biologic BCS-805 battery cycler. The specific capacity of the ZAB was calculated using the following equations:<sup>S1</sup>

$$\text{Specific capacity (mAh g}^{-1}\text{)} = \frac{I \times t}{W_m} \quad (7)$$

where  $I$  is the applied current (mA),  $t$  is total serving time (hour),  $W_m$  is the mass of Zinc consumed in gram respectively.

### **Hydrogen evolution reaction:**

A catalyst coated glassy carbon RDE was served as the working electrode, Pt sheet as the counter electrode, Ag/AgCl (3M KCl) as the reference electrode and 0.5 M  $\text{H}_2\text{SO}_4$  as the electrolyte solution respectively for HER measurements. To obtain a uniform catalyst ink, 5 mg of catalyst powder was ultrasonically dispersed for 45 minutes in a solvent mixture consisting of isopropanol and water (2:1, 480  $\mu\text{L}$ ) together with 20  $\mu\text{L}$  of a 5 wt% Nafion

solution. After homogenization, 7  $\mu\text{L}$  of the resulting dispersion was dropped onto the surface of a GC electrode and allowed to dry naturally at room temperature, giving a final catalyst loading of approximately  $0.35 \text{ mg cm}^{-2}$ . For reference measurements, a Pt/C (20 wt%) ink was prepared following the identical protocol. Linear sweep voltammetry (LSV) was conducted at a rotation rate of 1600 rpm and a scan speed of  $5 \text{ mV s}^{-1}$ . The electrochemical surface area (ECSA) was determined from the double-layer capacitance ( $C_{dl}$ ), which was obtained by recording cyclic voltammograms at different scan rates within the non-Faradaic potential window. The following equation was used to calculate the mass activity:<sup>S3</sup>

Mass activity ( $\text{A g}^{-1}$ ) =  $\frac{j}{m}$ , where  $j$  is the measured current density at  $\eta = 0.35 \text{ V}$  &  $m$  is the mass loading of the catalyst ( $0.35 \text{ mg cm}^{-2}$ )

### **Oxygen Evolution Reaction:**

A catalyst ink was prepared by dispersing 5 mg of the catalyst in a mixture of isopropanol and water, followed by the addition of 50  $\mu\text{L}$  of 5 wt% Nafion solution. The mixture was sonicated for 30 min to obtain a homogeneous ink. The resulting catalyst ink was then applied onto carbon cloth to achieve a loading of  $1 \text{ mg cm}^{-2}$  and subsequently dried under ambient conditions. Commercial  $\text{RuO}_2$  was utilized as the benchmark catalyst. A graphite rod was employed as the counter electrode, while an Hg/HgO electrode served as the reference. Linear sweep voltammetry (LSV) measurements were carried out at a scan rate of  $5 \text{ mV s}^{-1}$ . The recorded potentials were converted to the reversible hydrogen electrode (RHE) scale using the equation:

$$E_{\text{RHE}} = E_{\text{Hg/HgO}} + 0.098 \text{ V} + 0.0591 \times \text{pH}. \quad (8)$$

### **Computational Details:**

DFT calculations were performed in the linear combination of atomic orbitals (LCAO) method as implemented in Quantum ATK (Synopsys, USA) package.<sup>S4</sup> The exchange-correlation of electrons was included using Generalized Gradient Approximation (GGA) of Perdew-Burke Ernzerhof (PBE) correlation functional.<sup>S5</sup> The van der Waals interactions were taken care of using DFT-D2 of Grimme's method.<sup>S6</sup> Brillouin zone is sampled using a Monkhorst-Pack mesh of  $2 \times 2 \times 1$  k-points for all the geometry optimization and electronic structure calculations.<sup>4</sup> The convergence criteria of  $10^{-5} \text{ eV}$  and  $10^{-2} \text{ eV \AA}^{-1}$  are used for the energy and forces, respectively, until all geometrical structures are totally relaxed. The experimental data at 298.15 K were taken from the NIST database for the gaseous molecules.

The ORR reaction pathways on the three models were systematically investigated.

In alkaline media, the four-electron ORR pathway could be summarized by the following elementary steps:

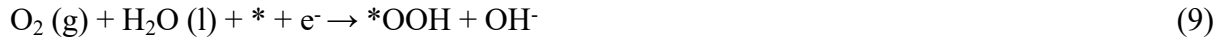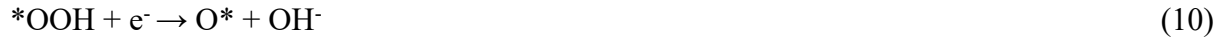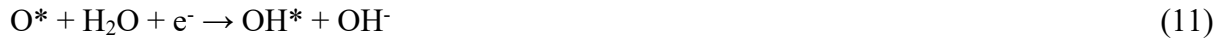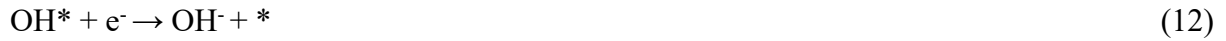

where the \* denotes an active site of the catalyst, \*OOH, \*O and \*OH are the oxygen-containing intermediates, respectively.

The free energies of reactants and each intermediate state at an applied electrode potential U were calculated as follows:

$$\Delta G = \Delta E + \Delta E_{\text{ZPE}} - T\Delta S - neU \quad (13)$$

where the  $\Delta E$ ,  $\Delta E_{\text{ZPE}}$  and  $\Delta S$  are the changes of total energy, zero-point energy and entropy during the reactions; T is the temperature; U is the electrode potential and n is the number of electrons transferred. The equilibrium potential  $U^0$  for ORR was determined to be 0.455 V vs NHE alkaline media.

The Gibbs free energy of hydrogen adsorption ( $\Delta G_{\text{H}^*}$ ) was evaluated according to:

$$\Delta G_{\text{H}^*} = \Delta E_{\text{ad}} + \Delta E_{\text{ZPE}} - T\Delta S_{\text{H}} \quad (14)$$

where  $\Delta E_{\text{ad}}$  denotes the adsorption energy of hydrogen,  $\Delta E_{\text{ZPE}}$  is the zero-point energy correction, and  $\Delta S_{\text{H}}$  represents the entropy change at temperature T.

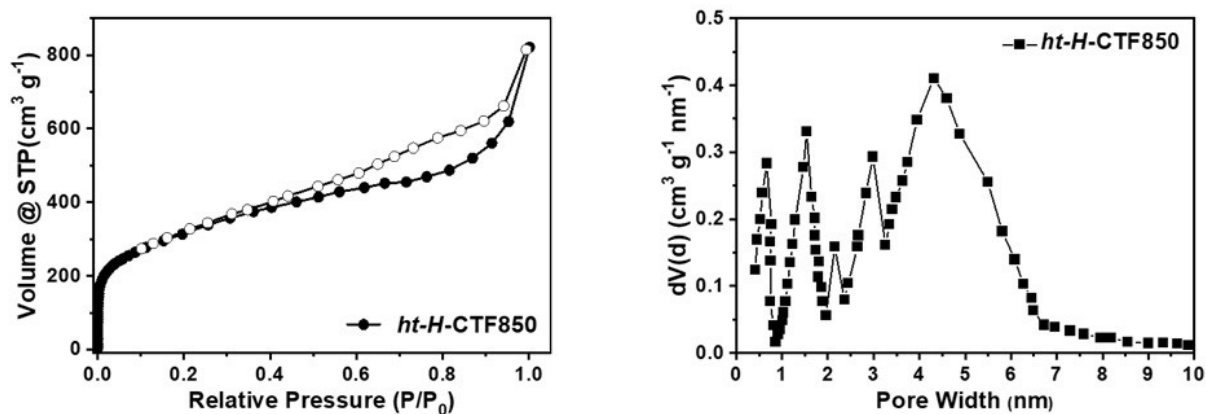

**Figure S1:** (a) BET Isotherm (inset synthetic scheme) and (b) Pore size distribution of *ht-H-CTF850*.

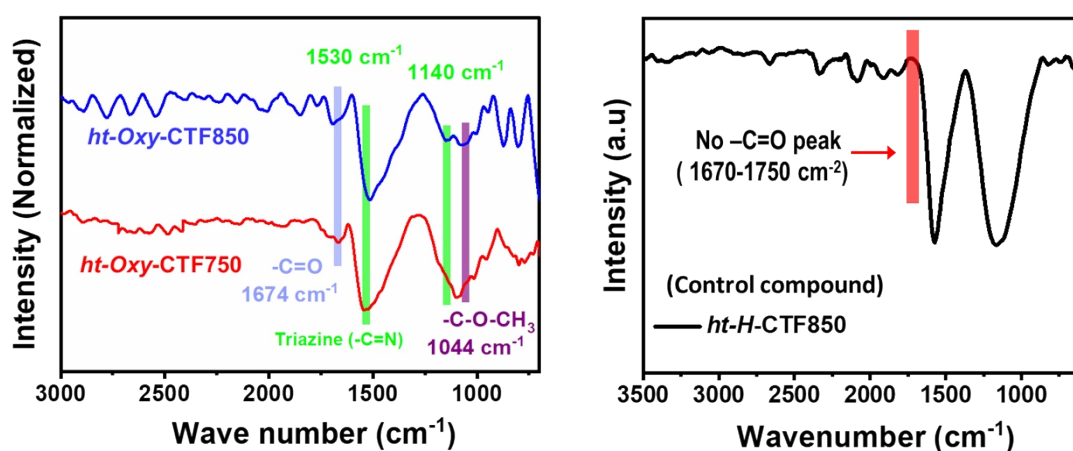

**Figure S2:** FTIR spectra *ht-Oxy-CTFs* (left) and *ht-H-CTF850* (right).

**Table S1:** Textural properties for *ht-H-CTF850* (*control compound*) derived from  $N_2$  isotherms (77 K, 1 bar).

| Materials          | $S_{\text{BET}}$<br>( $\text{m}^2 \text{g}^{-1}$ ) | $V_{\text{micro}}$<br>( $\text{cm}^3 \text{g}^{-1}$ ) | $V_{\text{tot}}$<br>( $\text{cm}^3 \text{g}^{-1}$ ) | $V_{\text{micro}}/V_{\text{tot}}$ |
|--------------------|----------------------------------------------------|-------------------------------------------------------|-----------------------------------------------------|-----------------------------------|
| <i>ht-H-CTF850</i> | 928                                                | 0.26                                                  | 0.54                                                | 0.48                              |

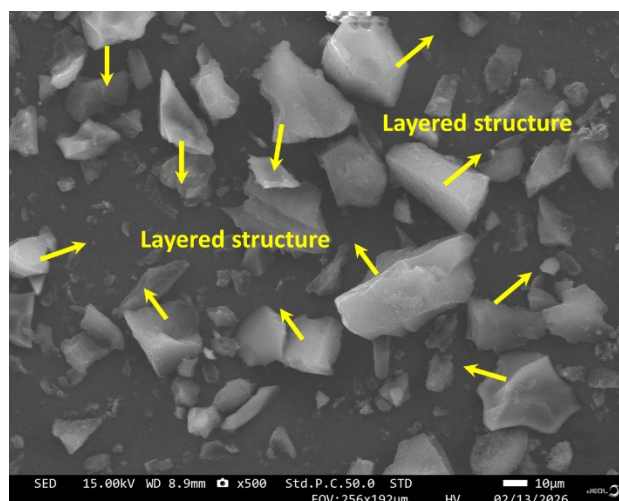

**Figure S3:** FESEM images illustrating the uniform layered morphology of *ht-Oxy-CTF850* across multiple regions of the sample.

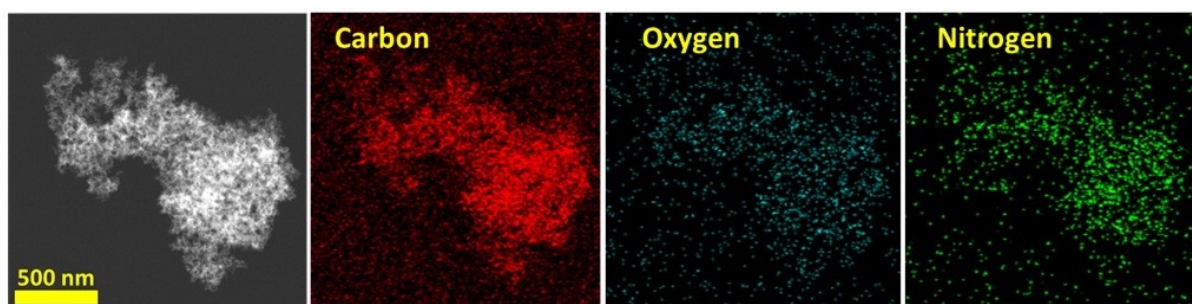

**Figure S4:** Energy-dispersive X-ray spectroscopy (EDX) elemental mapping of *ht-Oxy-CTF750*

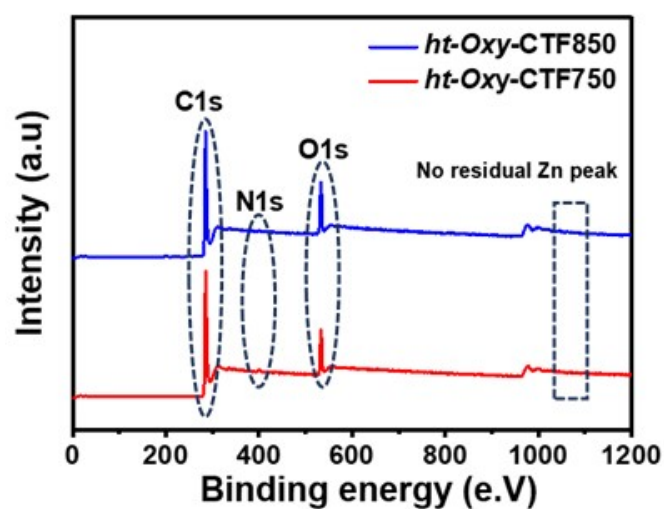

**Figure S5:** XPS survey spectrum of *ht-Oxy-CTF750* and *ht-Oxy-CTF850* respectively.

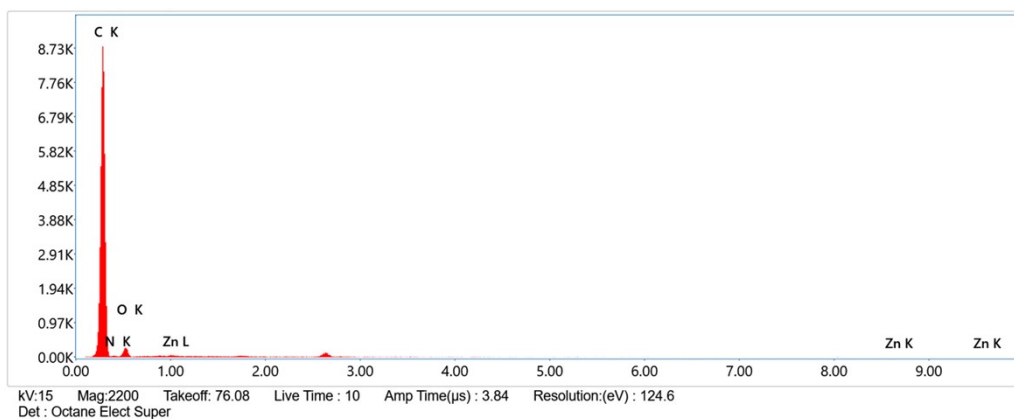

**Figure S6:** EDS spectrum of *ht-Oxy-CTF850*

**Table S2:** Zinc content in *ht-Oxy-CTF* samples determined by ICP-OES

| Samples                | Zinc concentration (ppm) |
|------------------------|--------------------------|
| Blank (without sample) | 0.01                     |
| <i>ht-Oxy-CTF750</i>   | 3.72                     |
| <i>ht-Oxy-CTF850</i>   | 5.33                     |

**Table S3:** Atomic percentages of various elements, as determined by high-resolution core-level XPS analysis

| Sample               | C (at%) | N(at%) | O(at%) * |
|----------------------|---------|--------|----------|
| <i>ht-Oxy-CTF750</i> | 85.79   | 1.66   | 12.55    |
| <i>ht-Oxy-CTF850</i> | 85.23   | 0.37   | 14.4     |

\*Including moisture/trapped oxygen contribution as seen in XPS analysis

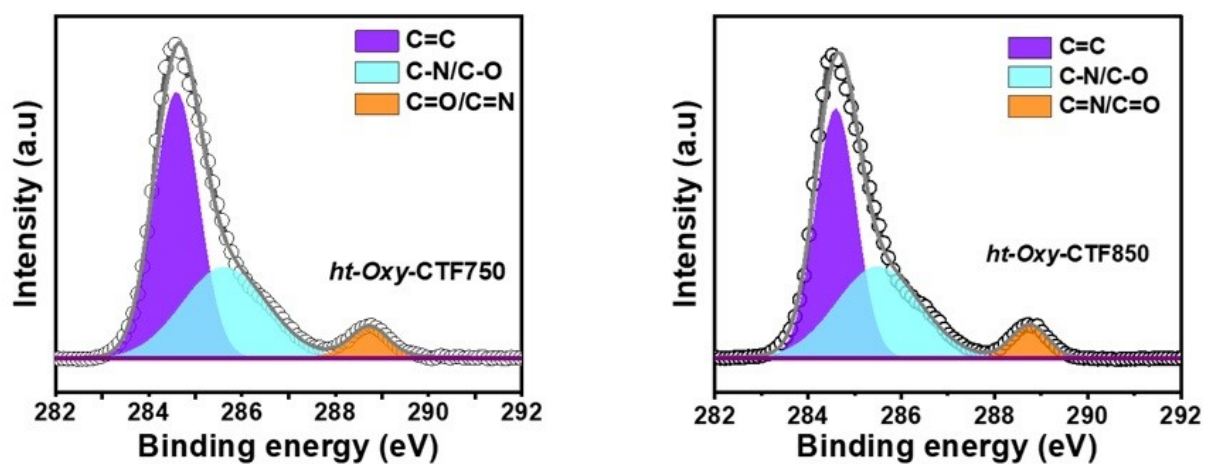

**Figure S7:** Deconvoluted XPS core-level spectra of C 1s: (a) *ht-Oxy-CTF750* and (b) *ht-Oxy-CTF850*

**Table S4:** Relative percentages of different oxygen species determined by XPS analysis.

| Materials            | (-C-O)<br>(%) | (-C=O)<br>(%) | Trapped Moisture/gas<br>(%) |
|----------------------|---------------|---------------|-----------------------------|
| <i>ht-Oxy-CTF750</i> | 54.76         | 3.03          | 42.21                       |
| <i>ht-Oxy-CTF850</i> | 48.55         | 2.66          | 48.79                       |

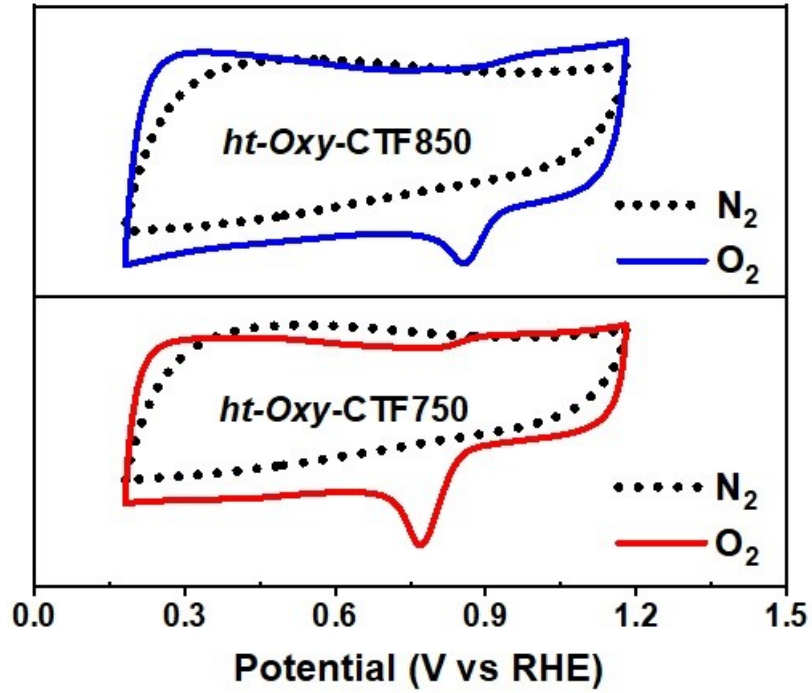

**Figure S8:** CV curves of *ht-Oxy-CTFs* in  $N_2$ -(dotted) and  $O_2$ -(solid) saturated 0.1M KOH electrolytes

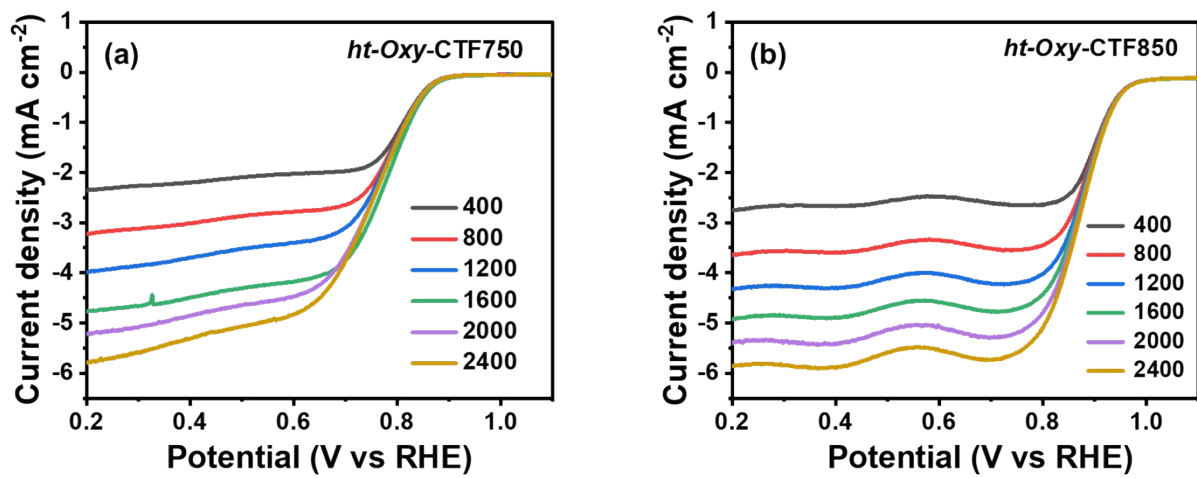

**Figure S9:** LSV curves of (a) *ht-Oxy-CTF750* and (b) *ht-Oxy-CTF850* at different rotation speed (400 - 2400 rpm).

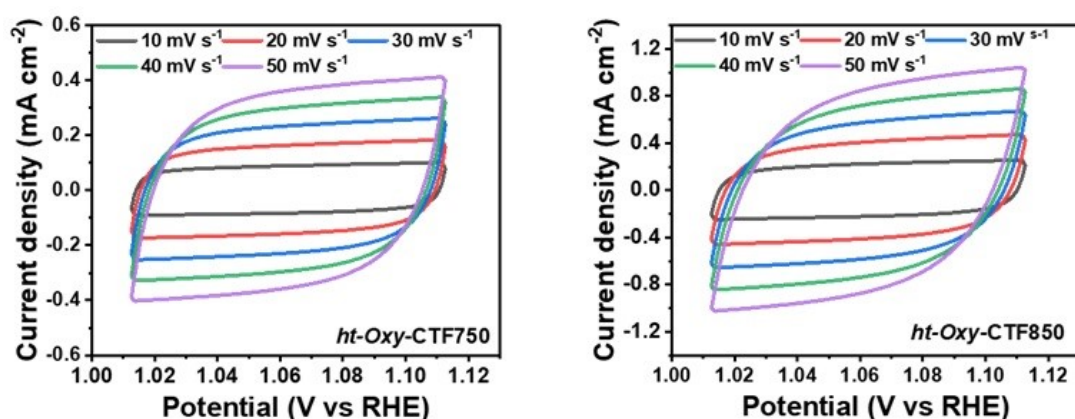

**Figure S10:** Cyclic voltammograms of *ht-Oxy-CTFs* in the non-faradic region at various scan rates. (a) *ht-Oxy-CTF750* and (b) *ht-Oxy-CTF850* in 0.1M KOH

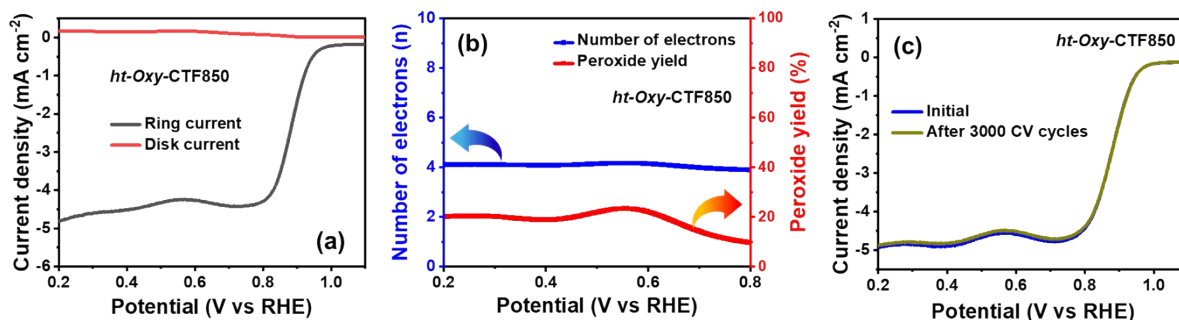

**Figure S11:** The ORR polarization curves of the *ht-Oxy-CTF850* recorded on the RRDE at the rotation rate of 1600 rpm. (b) Electron transfer number ( $n$ ) and  $H_2O_2$  yield of *ht-Oxy-CTF850* derived from RRDE measurements (0.2 - 0.8 V). (c) LSV curves of *ht-Oxy-CTF850* before and after 3000 CV cycles.

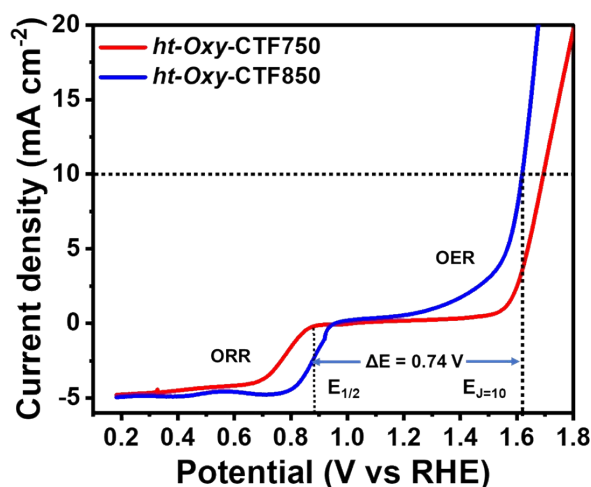

**Figure S12:** LSV curves between the ORR and OER *ht-Oxy-CTF750* and *ht-Oxy-CTF850*.

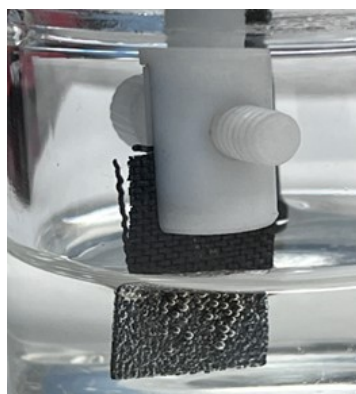

**Figure S13:** Photograph showing bubble formation on the electrode surface during the oxygen evolution reaction.

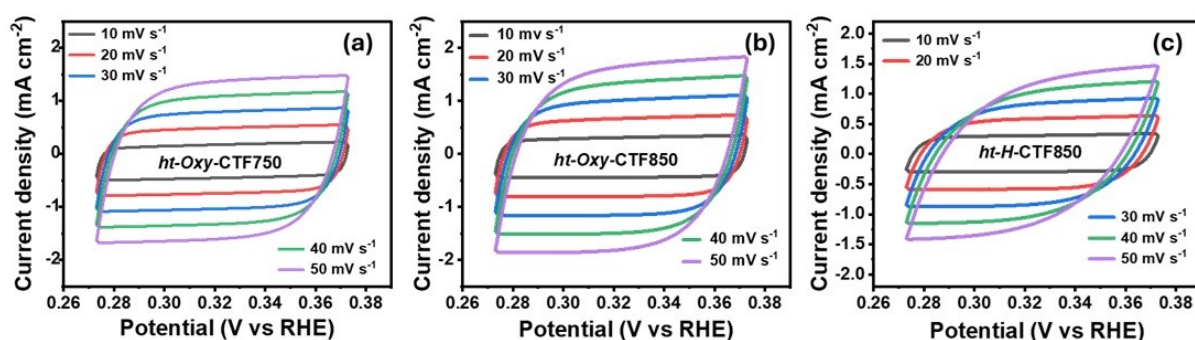

**Figure S14:** Cyclic voltammograms of *ht-Oxy-CTFs* in the non-faradic region at various scan rates. (a) *ht-Oxy-CTF750* and (b) *ht-Oxy-CTF850* and (c) *ht-H-CTF850* in 0.5 H<sub>2</sub>SO<sub>4</sub>

**Table S5:** Calculated values of  $C_{dl}$ , ECSA, RF, mass activity, and specific activity of the synthesized catalysts.

| Materials                                | Electrolyte                        | $C_{dl}$ (mF) | ECSA (cm <sup>2</sup> ) | RF    | Mass activity at $\eta$ @ 0.35 V (A g <sup>-1</sup> ) |
|------------------------------------------|------------------------------------|---------------|-------------------------|-------|-------------------------------------------------------|
| <i>ht-Oxy-CTF750</i>                     | 0.5 H <sub>2</sub> SO <sub>4</sub> | 5.68          | 162.2                   | 827.5 | 114.2                                                 |
| <i>ht-Oxy-CTF850</i>                     | 0.5 H <sub>2</sub> SO <sub>4</sub> | 6.46          | 184.5                   | 941.3 | 166.2                                                 |
| <i>ht-H-CTF850</i><br>(control compound) | 0.5 H <sub>2</sub> SO <sub>4</sub> | 4.11          | 117.4                   | 598.9 | 91.4                                                  |

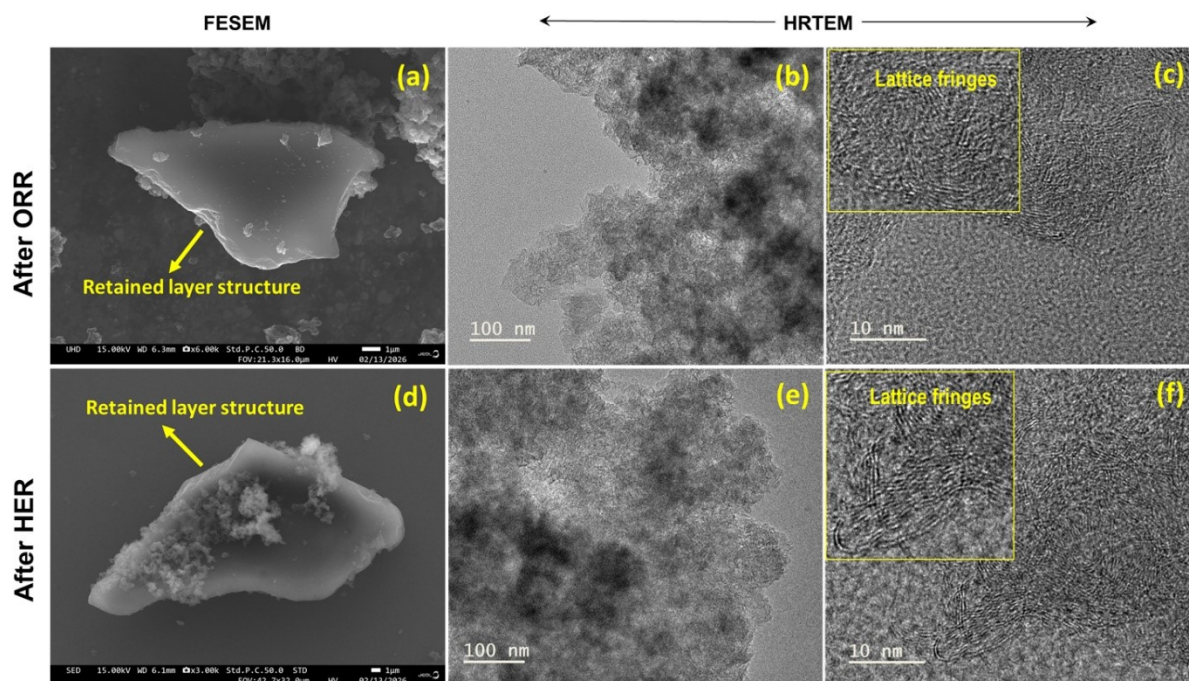

**Figure S15:** Morphological analysis of *ht-Oxy-CTF850* after long term electrocatalytic stability test.

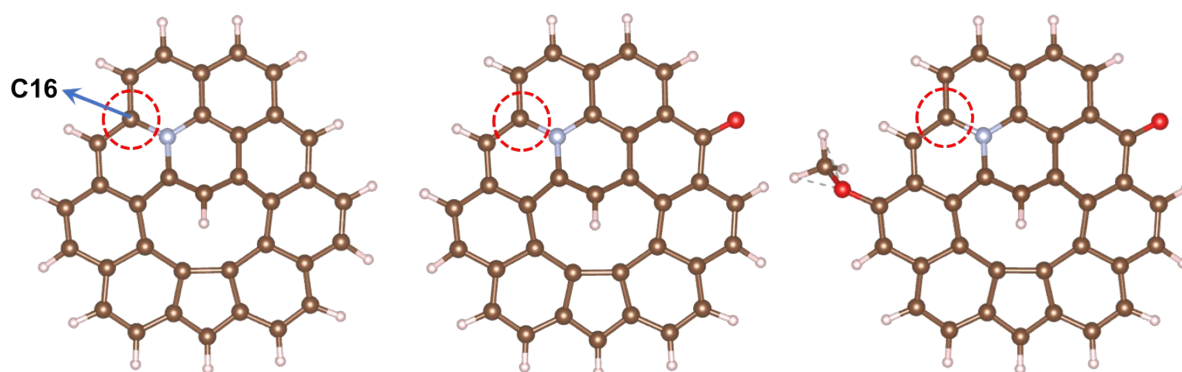

**Figure S16:** Optimized geometries of (a) Gr-N, (b) Gr-N+CO, and (c) Gr-N+CO+OMe.

**Table S6:** DFT-calculated partial charges (e) of individual carbon atoms in Gr-N, Gr-N+CO, and Gr-N+CO+OMe.

| Carbon number | Gr-N   | Gr-N+CO | Gr-N+CO+OMe |
|---------------|--------|---------|-------------|
| C1            | -0.055 | -0.039  | -0.043      |
| C2            | 0.135  | 0.137   | 0.136       |
| C3            | 0.083  | 0.086   | 0.086       |
| C5            | 0.03   | 0.032   | 0.031       |
| C6            | 0.124  | 0.119   | 0.117       |
| C7            | 0.018  | 0.029   | 0.03        |
| C8            | -0.022 | 0.129   | 0.127       |
| C9            | 0.089  | 0.038   | 0.04        |
| C10           | 0.101  | 0.031   | 0.025       |
| C11           | 0.065  | 0.08    | 0.077       |
| C12           | 0.005  | 0.003   | -0.003      |
| C13           | -0.003 | 0.039   | 0.04        |

|     |        |        |        |
|-----|--------|--------|--------|
| C14 | 0.01   | 0.009  | 0.01   |
| C15 | 0.001  | -0.001 | -0.002 |
| C16 | 0.17   | 0.171  | 0.173  |
| C17 | -0.048 | -0.055 | -0.055 |
| C18 | 0.018  | 0.056  | 0.055  |
| C19 | -0.056 | -0.06  | -0.066 |
| C20 | 0.036  | 0.036  | 0.032  |
| C21 | 0.047  | 0.053  | 0.053  |
| C22 | -0.014 | 0.001  | 0      |
| C23 | -0.149 | -0.155 | -0.158 |
| C24 | -0.114 | -0.145 | -0.144 |
| C25 | 0.151  | 0.151  | 0.15   |
| C26 | 0.041  | 0.04   | 0.036  |
| C27 | 0.108  | 0.112  | 0.11   |
| C28 | 0.106  | 0.107  | 0.094  |
| C33 | 0.147  | 0.145  | 0.144  |
| C34 | 0.111  | 0.11   | 0.06   |
| C35 | 0.012  | -0.001 | 0.002  |
| C37 | -0.045 | -0.023 | -0.027 |
| C39 | 0.035  | 0.033  | 0.03   |
| C40 | 0.045  | 0.05   | 0.049  |
| C42 | 0.046  | 0.053  | 0.025  |

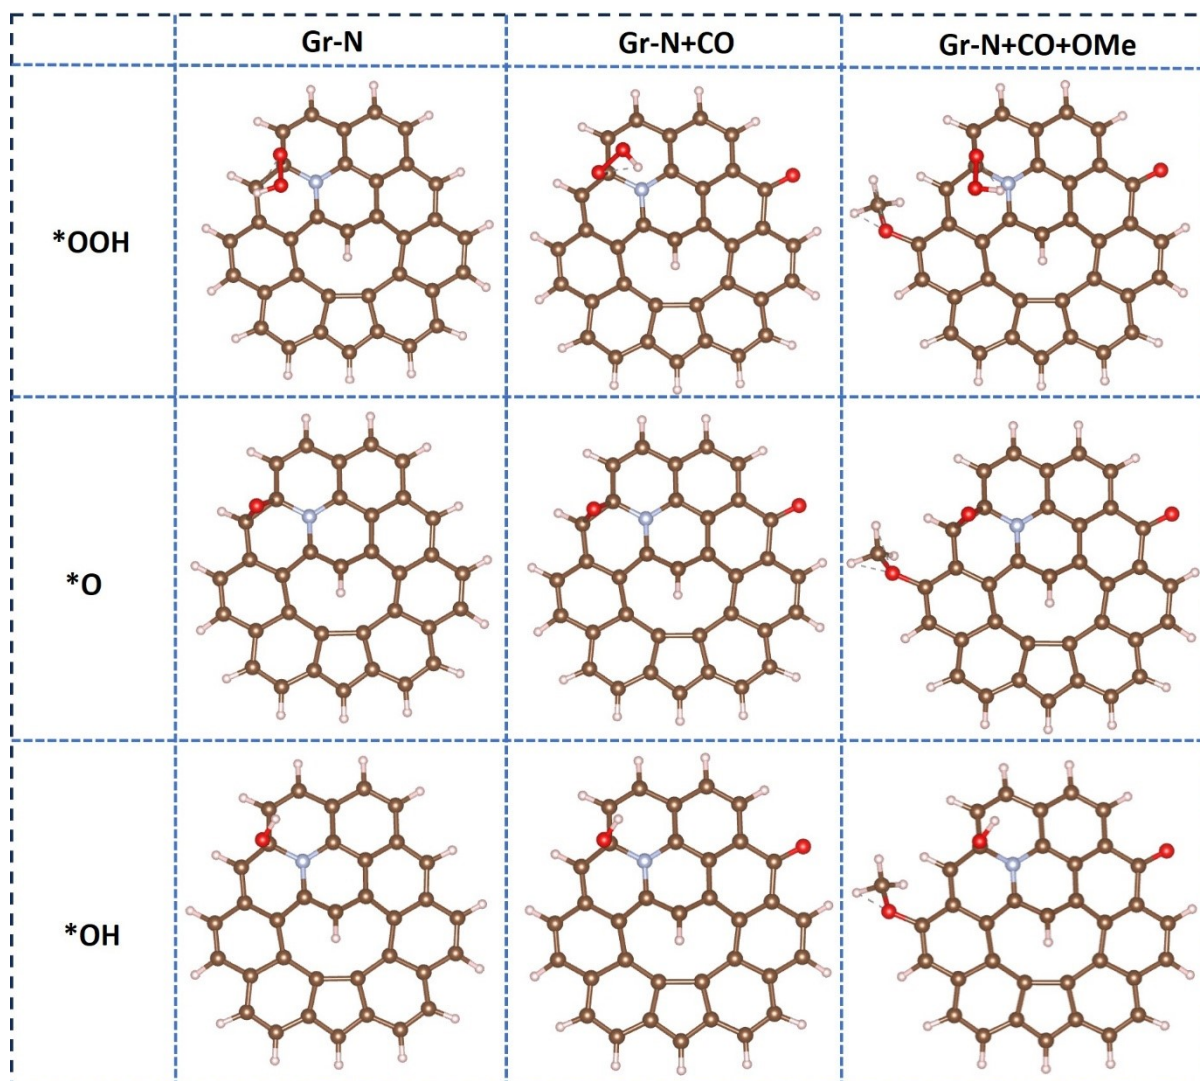

Figure S17: Optimized intermediate structures of the systems for each reaction step of ORR

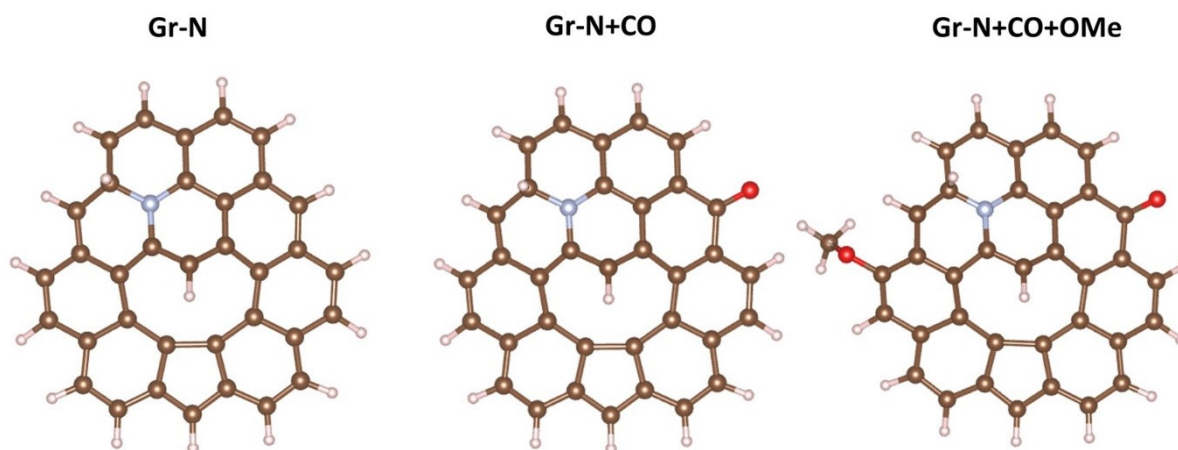

**Figure S18:** Optimized intermediate structures of the systems for HER

**Table S7:** Comparison of the Electrocatalytic ORR Activity of the *ht-Oxy*-CTF850 Catalyst with Other recently reported metal free carbon-based materials.

| Catalysts                   | Electrolyte      | $E_{1/2}$ (V vs RHE) | Electron transfer number (n) | Reference                                                        |
|-----------------------------|------------------|----------------------|------------------------------|------------------------------------------------------------------|
| <b><i>ht-Oxy</i>-CTF850</b> | <b>0.1 M KOH</b> | <b>0.88</b>          | <b>~ 4</b>                   | <b>This work</b>                                                 |
| N-PCNFs-43.5                | 0.1 M KOH        | 0.85                 | 3.90                         | <i>J. Mater. Chem. A</i> , 2025, <b>13</b> , 2650-2657           |
| v-N/CNS/Gr                  | 0.1 M KOH        | 0.85                 | 3.93                         | <i>ACS Nano</i> , 2025, <b>19</b> , 31870–31881                  |
| N/S-CN <sub>H</sub> -900    | 0.1 M KOH        | 0.86                 | ~ 4                          | <i>Small</i> 2025, <b>21</b> , 2410619                           |
| PD-COF-OH                   | 0.1 M KOH        | 0.76                 | 3.8                          | <i>Angew. Chem. Int. Ed.</i> , 2025, <b>64</b> , e202503434      |
| NPS-HPCNF                   | 0.1 M KOH        | 0.86                 | ~ 4                          | <i>Adv. Energy Mater.</i> 2025, <b>15</b> , 2405236              |
| Belt2                       | 0.1 M KOH        | 0.84                 | 3.97                         | <i>ACS Appl. Mater. Interfaces</i> 2025, <b>17</b> , 20096–20104 |
| JUC-650                     | 0.1 M KOH        | 0.72                 | 3.86                         | <i>Small</i> , 2024, <b>20</b> , 2305759                         |
| dFCMC                       | 0.1 M KOH        | 0.83                 | 4.01                         | <i>Adv. Energy Mater.</i> , 2024, <b>14</b> , 2401008            |
| DAF-COF                     | 0.1 M KOH        | 0.74                 | 3.88                         | <i>Adv. Mater.</i> , 2023, <b>35</b> , 2209129.                  |
| PYTA-PB-COF                 | 0.1 M KOH        | 0.78                 | 3.7                          | <i>Angew. Chem. Int. Ed.</i> , 2024, <b>63</b> , e202319247      |
| VP/CNs                      | 0.1 M KOH        | 0.86                 | 3.98-4.0                     | <i>J. Am. Chem. Soc.</i> , 2023, <b>145</b> ,                    |

|                 |           |      |      |                                                             |
|-----------------|-----------|------|------|-------------------------------------------------------------|
|                 |           |      |      | 25695–25704                                                 |
| BUCT-COF-11/CNT | 0.1 M KOH | 0.72 | 3.98 | <i>Angew. Chem. Int. Ed.</i> , 2023, <b>62</b> , e202216751 |
| CMP-Tdz/CCA     | 0.1 M KOH | 0.77 | 3.94 | <i>Small</i> 2023, <b>19</b> , 2207298.                     |
| JUC-528         | 0.1 M KOH | 0.7  | 3.81 | <i>J. Am. Chem. Soc.</i> , 2020, <b>142</b> , 8104–8108     |
| NPF-CNS-2       | 0.1 M KOH | 0.81 | 3.90 | <i>Small</i> 2020, <b>16</b> , 2004342                      |

**Table S8:** Comparison of zinc-air battery performance of the as-obtained *ht-Oxy-CTF850* catalyst with other previously reported metal free carbon-based catalyst.

| Catalysts            | OCP (V) | Specific Capacity (mAh g <sup>-1</sup> @mA cm <sup>-2</sup> ) | Power density (mW cm <sup>-2</sup> ) | Cyclic stability mA cm <sup>-2</sup> @hr | Reference                                                            |
|----------------------|---------|---------------------------------------------------------------|--------------------------------------|------------------------------------------|----------------------------------------------------------------------|
| <i>ht-Oxy-CTF850</i> | 1.46    | 792@10                                                        | 132.2                                | 5@205                                    | This Work                                                            |
| PD-COF-OH            | 1.35    | 676@10                                                        | 111.6                                | ND                                       | <i>Angew. Chem. Int. Ed.</i> , 2025, <b>64</b> , e202503434          |
| N/S-CNH-900          | 1.48    | 780@10                                                        | 128                                  | ND                                       | <i>Small</i> , 2025, <b>21</b> , 2410619                             |
| JUC-650              | 1.38    | 722.6@50                                                      | 101.5                                | ND                                       | <i>Small</i> , 2024, <b>20</b> , 2305759.                            |
| FBNC-950             | 1.47    | ND                                                            | 147                                  | 5@100                                    | <i>Carbon</i> , 2024, <b>225</b> , 119125.                           |
| NPCNF-O              | 1.46    | 726@10                                                        | 125.1                                | 5@200                                    | <i>ACS Catal.</i> , 2022, <b>12</b> , 4002–4015.                     |
| NPF@CNF80            | 1.49    | 804 @10                                                       | 159                                  | 5@135                                    | <i>ACS Appl. Mater. Interfaces.</i> , 2021, <b>13</b> , 13328-13337. |
| NCF                  | 1.41    | ND                                                            | 173                                  | 5 @10000 s                               | <i>Adv. Funct. Mater.</i> , 2021, <b>31</b> , 2103187.               |
| CF-K-A               | 1.4     | ND                                                            | 61.5                                 | ND                                       | <i>Small</i> , 2018, <b>14</b> , 1800563                             |
| NPCS-900             | 1.4     | 684 @2                                                        | 79                                   | 2@56                                     | <i>Nano Energy</i> , 2019, <b>60</b> , 536–544.                      |

|          |      |          |       |       |                                                       |
|----------|------|----------|-------|-------|-------------------------------------------------------|
| NOGB-800 | 1.5  | ND       | 111.9 | 10@30 | <i>Adv. Energy Mater.</i> , 2019, <b>9</b> , 1803867. |
| NDGs-800 | 1.45 | 750.8@10 | 115.2 | 10@78 | <i>ACS Energy Lett.</i> , 2018, <b>3</b> , 1183–1191. |

ND: Not determined

**Table S9:** Comparison of the Electrocatalytic HER Activity of the *ht-Oxy*-CTF850 Catalyst with Other recently reported metal free carbon-based materials in acidic medium.

| Catalysts                   | Electrolyte                              | Overpotential (mV)@<br>10 mA cm <sup>-2</sup> | Reference                                                         |
|-----------------------------|------------------------------------------|-----------------------------------------------|-------------------------------------------------------------------|
| <b><i>ht-Oxy</i>-CTF850</b> | <b>0.5 M H<sub>2</sub>SO<sub>4</sub></b> | <b>81.5</b>                                   | <b>This Work</b>                                                  |
| ED-COF                      | 0.5 M H <sub>2</sub> SO <sub>4</sub>     | 103.6                                         | <i>Adv. Sci.</i> 2025, <b>12</b> , 2501442                        |
| TPA-OMe                     | 0.5 M H <sub>2</sub> SO <sub>4</sub>     | 353                                           | <i>Small</i> , 2025, <b>21</b> , 2500502                          |
| WCMG                        | 0.5 M H <sub>2</sub> SO <sub>4</sub>     | 179                                           | <i>Carbon</i> , 2025, <b>224</b> , 120706                         |
| TAT-TFBE                    | 0.5 M H <sub>2</sub> SO <sub>4</sub>     | 222                                           | <i>Adv. Mater.</i> 2024, <b>36</b> , 2209919                      |
| BQ-BO                       | 0.5 M H <sub>2</sub> SO <sub>4</sub>     | 230                                           | <i>J. Mater. Chem. A</i> , 2024, <b>12</b> , 3294–3303            |
| PCTF-10500                  | 0.5 M H <sub>2</sub> SO <sub>4</sub>     | 227                                           | <i>ACS Appl. Nano Mater.</i> 2023, <b>6</b> , 24, 22684–22692     |
| JLNU-302                    | 0.5 M H <sub>2</sub> SO <sub>4</sub>     | 151                                           | <i>J. Mater. Chem. A</i> , 2022, <b>10</b> , 10092–10097          |
| 4%-SPCNF                    | 0.5 M H <sub>2</sub> SO <sub>4</sub>     | 310.8                                         | <i>ACS Appl. Mater. Interfaces</i> 2022, <b>14</b> , 834–849      |
| rGO/SiO <sub>2</sub>        | 0.5 M H <sub>2</sub> SO <sub>4</sub>     | 134                                           | <i>Small Methods</i> , 2021, <b>5</b> , 2100621.                  |
| Functionalized CNT          | 0.5 M H <sub>2</sub> SO <sub>4</sub>     | 135                                           | <i>Nanoscale</i> , 2021, <b>13</b> , 4444–4450                    |
| FL-BP@BG                    | 0.5 M H <sub>2</sub> SO <sub>4</sub>     | 385.9                                         | <i>J. Mater. Chem. A</i> , 2020, <b>8</b> , 20446–20452           |
| BINOL-CTF-10 500            | 0.5 M H <sub>2</sub> SO <sub>4</sub>     | 311                                           | <i>ACS Appl. Mater. Interfaces</i> 2020, <b>12</b> , 44689–44699. |
| N, S,P Porous carbon        | 0.5 M H <sub>2</sub> SO <sub>4</sub>     | 260                                           | <i>Carbon</i> , 2020, <b>162</b> , 586–594.                       |

|                     |                                      |       |                                                                |
|---------------------|--------------------------------------|-------|----------------------------------------------------------------|
| P, B-G              | 0.5 M H <sub>2</sub> SO <sub>4</sub> | 385.9 | <i>J. Mater. Chem. A</i> , 2020, <b>8</b> , 20446–20452.       |
| N-carbon nanosheets | 0.5 M H <sub>2</sub> SO <sub>4</sub> | 90    | <i>Energy Environ. Sci.</i> , 2019, <b>12</b> , 322–333.       |
| N, S-G              | 0.5 M H <sub>2</sub> SO <sub>4</sub> | 230   | <i>Angew. Chem., Int. Ed.</i> , 2018, <b>57</b> , 13302–13307. |

### References:

- S1. F. Kong, X. Cui, Y. Huang, H. Yao, Y. Chen, H. Tian, G. Meng, C. Chen, Z. Chang and J. Shi, *Angew Chem. Int. Ed.* 2022, **61**, e202116290.
- S2. Y. Zheng, H. Song, S. Chen, X. Yu, J. Zhu, J. Xu, K. A. I. Zhang, C. Zhang and T. Liu, *Small*, 2020, **16**, 2004342.
- S3. M. Gao, W. Sheng, Z. Zhuang, Q. Fang, S. Gu, J. Jiang and Y. Yan, *J. Am Chem. Soc.*, 2014, **136**, 7077.
- S4. S. Smidstrup, T. Markussen, P. Vancraeyveld, J. Wellendorff, J. Schneider, T. Gunst, B. Verstichel, D. Stradi, P. A. Khomyakov, U. G. Vej-Hansen, M.-E. Lee, S. T. Chill, F. Rasmussen, G. Penazzi, F. Corsetti, A. Ojanperä, K. Jensen, M. L. N. Palsgaard, U. Martinez, A. Blom, M. Brandbyge and K. Stokbro, *J. Phys.: Condens. Matter*, 2020, **32**, 015901.
- S5. J. P. Perdew, K. Burke and M. Ernzerhof, *Phys. Rev. Lett.*, 1996, **77**, 3865-3868.
- S6. S. Grimme, *J. Comput. Chem.* 2006, **27**, 1787-1799.
